# Supplementary material for: Impact of bacterial culture medium on composition and characteristics of Burkholderia pseudomallei extracellular polymeric substances
Source: PeerJ. 2025 Dec 16;13:e20488. doi: 10.7717/peerj.20488 (PMC12716132; doi:10.7717/peerj.20488)
Supplement: Supplemental Information 1 [file peerj-13-20488-s001.xlsx]

## Sheet: Supplementary Table 1
Supplementary Table 1 - Raw data	The data were calculated from triplicates within a single experiment, and the experiments were performed on three independent occasions (total samples, n =9).
Percentage of EPS in biofilm (%)	exp. 1	exp. 2	exp.3			exp. 1	exp. 2	exp.3			exp. 1	exp. 2	exp.3
Days	BHI	BHI	BHI	Mean	SD	LB	LB	LB	Mean	SD	MVBM	MVBM	MVBM	Mean	SD
2	46.8649	49.2516	44.0945	46.737	2.58093	64.3468	68.5843	67.8723	66.9345	2.26912	36.0265	38.6144	32.7348	35.7919	2.94681
4	57.4451	57.2462	57.0378	57.243	0.203643	71.8053	70.8014	70.6104	71.0724	0.641918	43.4021	43.0679	42.652	43.0407	0.375793
6	54.5535	63.4494	62.9503	60.3177	4.9982	70.8995	72.3005	72.6778	71.9593	0.936967	47.8289	48.5178	48.5932	48.3133	0.42117
Carbon to nitrogen ratio	exp. 1	exp. 2	exp.3			exp. 1	exp. 2	exp.3			exp. 1	exp. 2	exp.3
Days	BHI	BHI	BHI	Mean	SD	LB	LB	LB	Mean	SD	MVBM	MVBM	MVBM	Mean	SD
0	8.46561	8.71898	8.3632	8.51593	0.18315	14.3829	12.3686	10.1259	12.2925	2.12952	103.175	93.4412	98.832	98.4826	4.87612
2	21.6185	22.3026	21.6185	21.8465	0.394982	9.84304	18.7661	12.9077	13.839	4.53385	251.701	129.252	190.476	190.476	61.2245
4	24.642	27.5298	27.5298	26.5672	1.66724	20.7283	14.2022	13.3985	16.1097	4.01999	358.788	329.697	387.879	358.788	29.0909
6	14.7656	7.55858	11.0421	11.1221	3.60417	10.582	12.025	12.7809	11.796	1.11718	440.476	440.476	369.048	416.667	41.2393
Dry weight of biofilm (g/L)	exp. 1	exp. 2	exp.3			exp. 1	exp. 2	exp.3			exp. 1	exp. 2	exp.3
Days	BHI	BHI	BHI	Mean	SD	LB	LB	LB	Mean	SD	MVBM	MVBM	MVBM	Mean	SD
2	0.3228	0.3354	0.3512	0.336467	0.01423	0.248	0.2324	0.235	0.238467	0.00835783	0.3624	0.389	0.3982	0.3832	0.0185914
4	0.4098	0.4078	0.4122	0.409933	0.00220303	0.262	0.2658	0.2654	0.2644	0.00208806	0.4108	0.4156	0.41998	0.41546	0.0045916
6	0.4882	0.4166	0.4142	0.439667	0.0420482	0.3502	0.3434	0.3488	0.347467	0.00359073	0.5366	0.5276	0.526	0.530067	0.00571431
Dry weight of EPS (g/L)	exp. 1	exp. 2	exp.3			exp. 1	exp. 2	exp.3			exp. 1	exp. 2	exp.3
Day	BHI	BHI	BHI	Mean	SD	LB	LB	LB	Mean	SD	MVBM	MVBM	MVBM	Mean	SD
2	0.15128	0.16519	0.15486	0.15711	0.0072228	0.15958	0.15939	0.1595	0.15949	9.53939e-05	0.13056	0.15021	0.13035	0.13704	0.011406
4	0.23541	0.23345	0.23511	0.234657	0.00105571	0.18813	0.18819	0.1874	0.187907	0.000439811	0.178296	0.17899	0.17913	0.178805	0.000446615
6	0.26633	0.26433	0.26074	0.2638	0.00283244	0.24829	0.24828	0.2535	0.250023	0.00301089	0.25665	0.25598	0.2556	0.256077	0.000531633
Total carbon in EPS (mg/mL)	exp. 1	exp. 2	exp.3			exp. 1	exp. 2	exp.3			exp. 1	exp. 2	exp.3
Days	BHI	BHI	BHI	Mean	SD	LB	LB	LB	Mean	SD	MVBM	MVBM	MVBM	Mean	SD
2	4.3058	4.3648	4.98427	4.55162	0.375841	3.706	4.10914	3.45034	3.75516	0.332141	3.0177	3.12586	3.08653	3.0767	0.0547469
4	10.7758	10.9331	10.9331	10.8807	0.0908319	6.68535	4.53196	4.48279	5.23337	1.25769	6.93117	6.08555	6.29204	6.43625	0.440873
6	32.8702	32.8407	33.5782	33.0964	0.41752	33.9912	34.1976	34.1976	34.1288	0.119217	33.5093	33.5683	33.4798	33.5192	0.0450597
Total nitrogen in EPS (mg/mL)	exp. 1	exp. 2	exp.3			exp. 1	exp. 2	exp.3			exp. 1	exp. 2	exp.3
Days	BHI	BHI	BHI	Mean	SD	LB	LB	LB	Mean	SD	MVBM	MVBM	MVBM	Mean	SD
2	8.2677	8.25713	8.54513	8.35665	0.163309	2.07687	2.0184	1.46037	1.85188	0.340317	0.84891	0.845432	0.760665	0.818335	0.0499744
4	9.31464	9.44987	9.22503	9.32985	0.11319	2.57992	2.29636	2.30762	2.39463	0.160559	1.45586	0.708622	0.699056	0.954512	0.434205
6	10.4236	11.5946	9.55193	10.5234	1.02499	2.4914	3.01303	2.75535	2.75326	0.260822	1.21828	1.20591	1.29379	1.23933	0.0475715
Total organic carbon in culture media (mg/mL)	exp. 1	exp. 2	exp.3			exp. 1	exp. 2	exp.3			exp. 1	exp. 2	exp.3
Days	BHI	BHI	BHI	Mean	SD	LB	LB	LB	Mean	SD	MVBM	MVBM	MVBM	Mean	SD
0	27733.3	27733.3	26133.3	27200	923.76	19733.3	21333.3	19733.3	20266.7	923.76	27733.3	27733.3	29333.3	28266.7	923.76
2	19733.3	19733.3	19733.3	19733.3	0	19733.3	21333.3	19733.3	20266.7	923.76	19733.3	10133.3	14933.3	14933.3	4800
4	19733.3	19733.3	19733.3	19733.3	0	19733.3	18133.3	19733.3	19200	923.76	19733.3	18133.3	21333.3	19733.3	1600
6	21333.3	21333.3	21333.3	21333.3	0	11733.3	13333.3	16533.3	13866.7	2444.04	19733.3	19733.3	16533.3	18666.7	1847.52
Total Kjeldahl nitrogen in culture media (mg/mL)	exp. 1	exp. 2	exp.3			exp. 1	exp. 2	exp.3			exp. 1	exp. 2	exp.3
Days	BHI	BHI	BHI	Mean	SD	LB	LB	LB	Mean	SD	MVBM	MVBM	MVBM	Mean	SD
0	3276	3180.8	3085.6	3180.8	95.2	1372	1724.8	1948.8	1681.87	290.787	268.8	296.8	296.8	287.467	16.1658
2	912.8	884.8	912.8	903.467	16.1658	2004.8	1136.8	1528.8	1556.8	434.677	251.701	129.252	190.476	190.476	61.2245
4	800.8	716.8	716.8	744.8	48.4974	952	1276.8	1472.8	1233.87	263.041	358.788	329.697	387.879	358.788	29.0909
6	1444.8	2822.4	1932	2066.4	698.565	1108.8	1108.8	1293.6	1170.4	106.694	440.476	440.476	369.048	416.667	41.2393
